# Supplementary material for: The MICA-129 dimorphism affects NKG2D signaling and outcome of hematopoietic stem cell transplantation
Source: PubMed Central journal article supplement (PMC4644379; doi:10.15252/emmm.201505246), 2015-10-19
Supplement: emmm0007-1480-sd2.pdf [file emmm0007-1480-sd2.pdf]

## Expanded View Figures

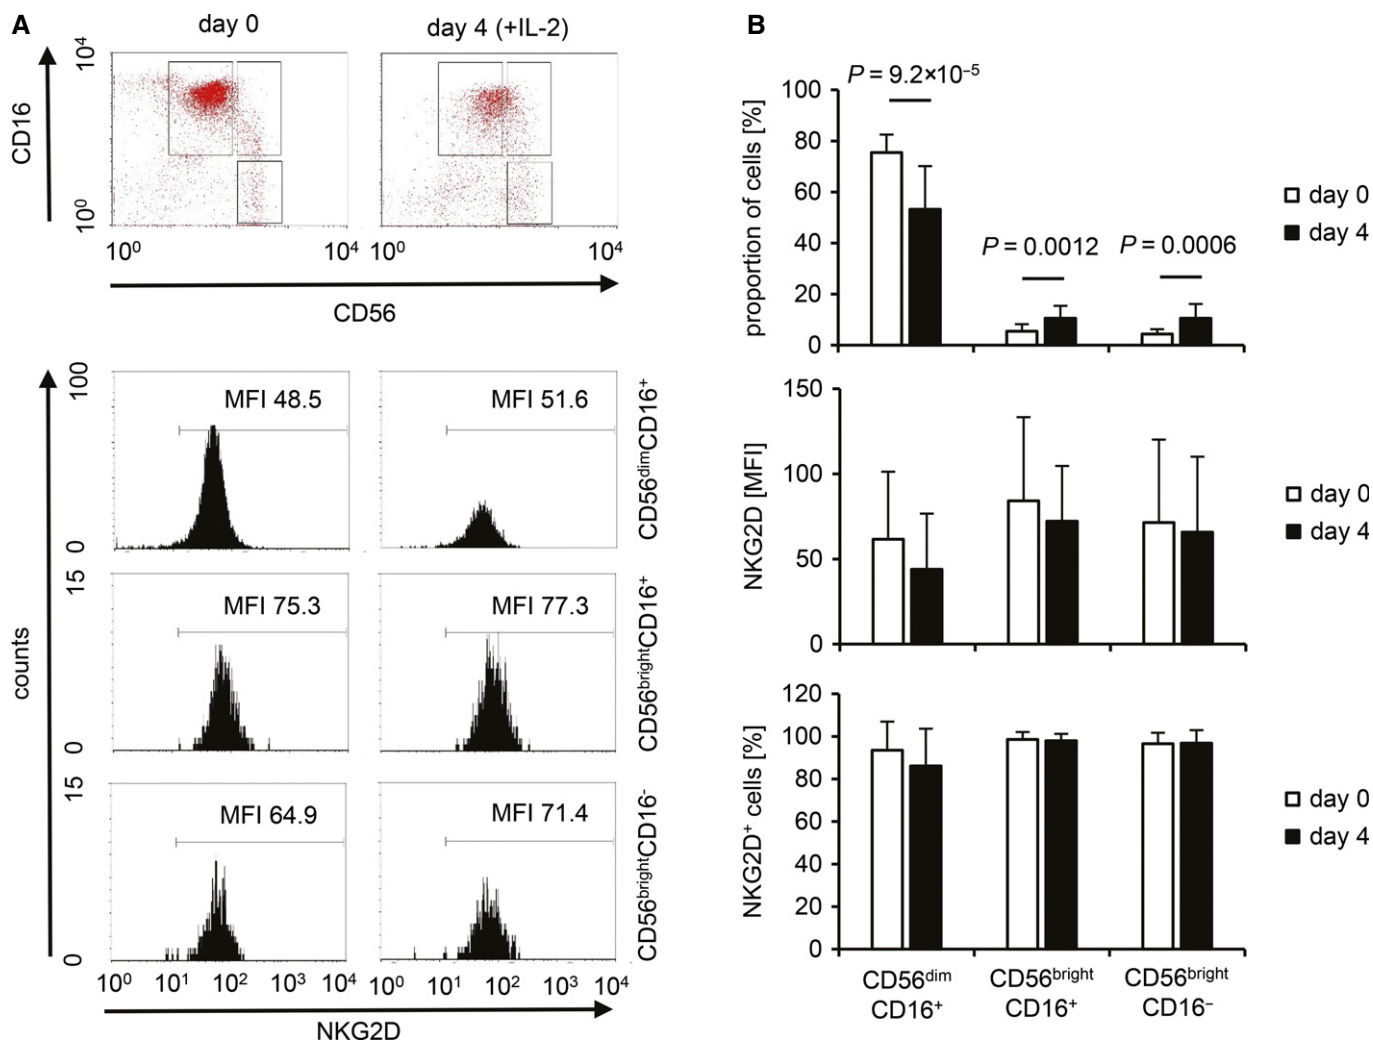

**Figure EV1. NKG2D expression on freshly isolated and IL-2-stimulated NK-cell populations.**

A Three populations (CD56<sup>dim</sup>CD16<sup>+</sup>, CD56<sup>bright</sup>CD16<sup>+</sup>, CD56<sup>bright</sup>CD16<sup>-</sup>) were gated on freshly isolated NK cells (day 0) and NK cells stimulated for 4 days with IL-2 (100 U/ml) as exemplified in the upper panel. The NKG2D expression on these NK-cell populations is displayed in the lower panel, and the MFI for NKG2D is indicated.

B Summaries (means + SD) of the proportion of the three NK-cell populations and their NKG2D expression intensity (MFI and percentage NKG2D<sup>+</sup> cells) at day 0 ( $n = 21$ ) and 4 days after IL-2 stimulation ( $n = 16$ ) are shown. The data were analyzed by *t*-test, and the *P*-values of significant differences are indicated.

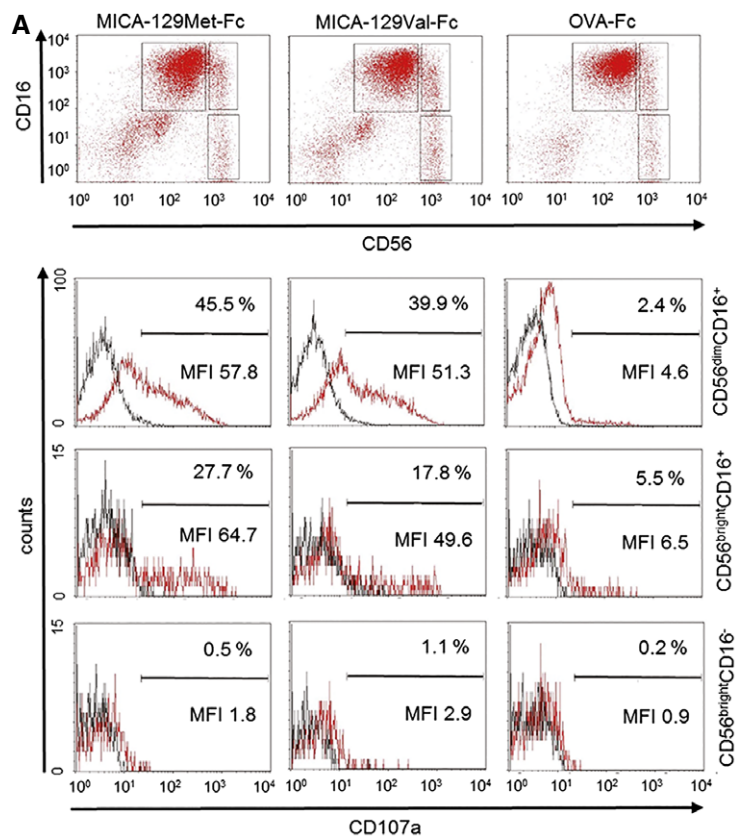

**Figure EV2. Degranulation of CD56<sup>dim</sup>CD16<sup>+</sup> and CD56<sup>bright</sup>CD16<sup>+</sup> NK cells in response to the MICA-129Met and the MICA-129Val isoforms.**

**A** Purified IL-2-stimulated NK cells (100 U/ml for 4 days) were cultured for 2 h on plates coated with MICA-129Met-Fc, MICA-129Val-Fc, or OVA-Fc proteins (10 µg/ml) before flow cytometry. The NK-cell populations were gated as illustrated in the upper panel (CD56<sup>dim</sup>CD16<sup>+</sup>, CD56<sup>bright</sup>CD16<sup>+</sup>, CD56<sup>bright</sup>CD16<sup>-</sup>), and CD107a expression was determined as displayed in the lower panel (red: CD107a, black: isotype control). The specific MFI (MFI CD107a minus MFI isotype control) and the percentage of CD107a<sup>+</sup> cells are indicated.

**B** A summary (means + SD) of 5 experiments is shown. The data were analyzed by t-test, and the P-values of significant differences are indicated.

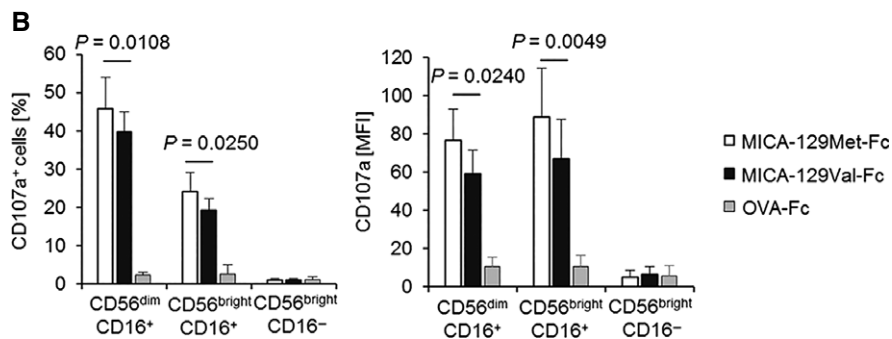

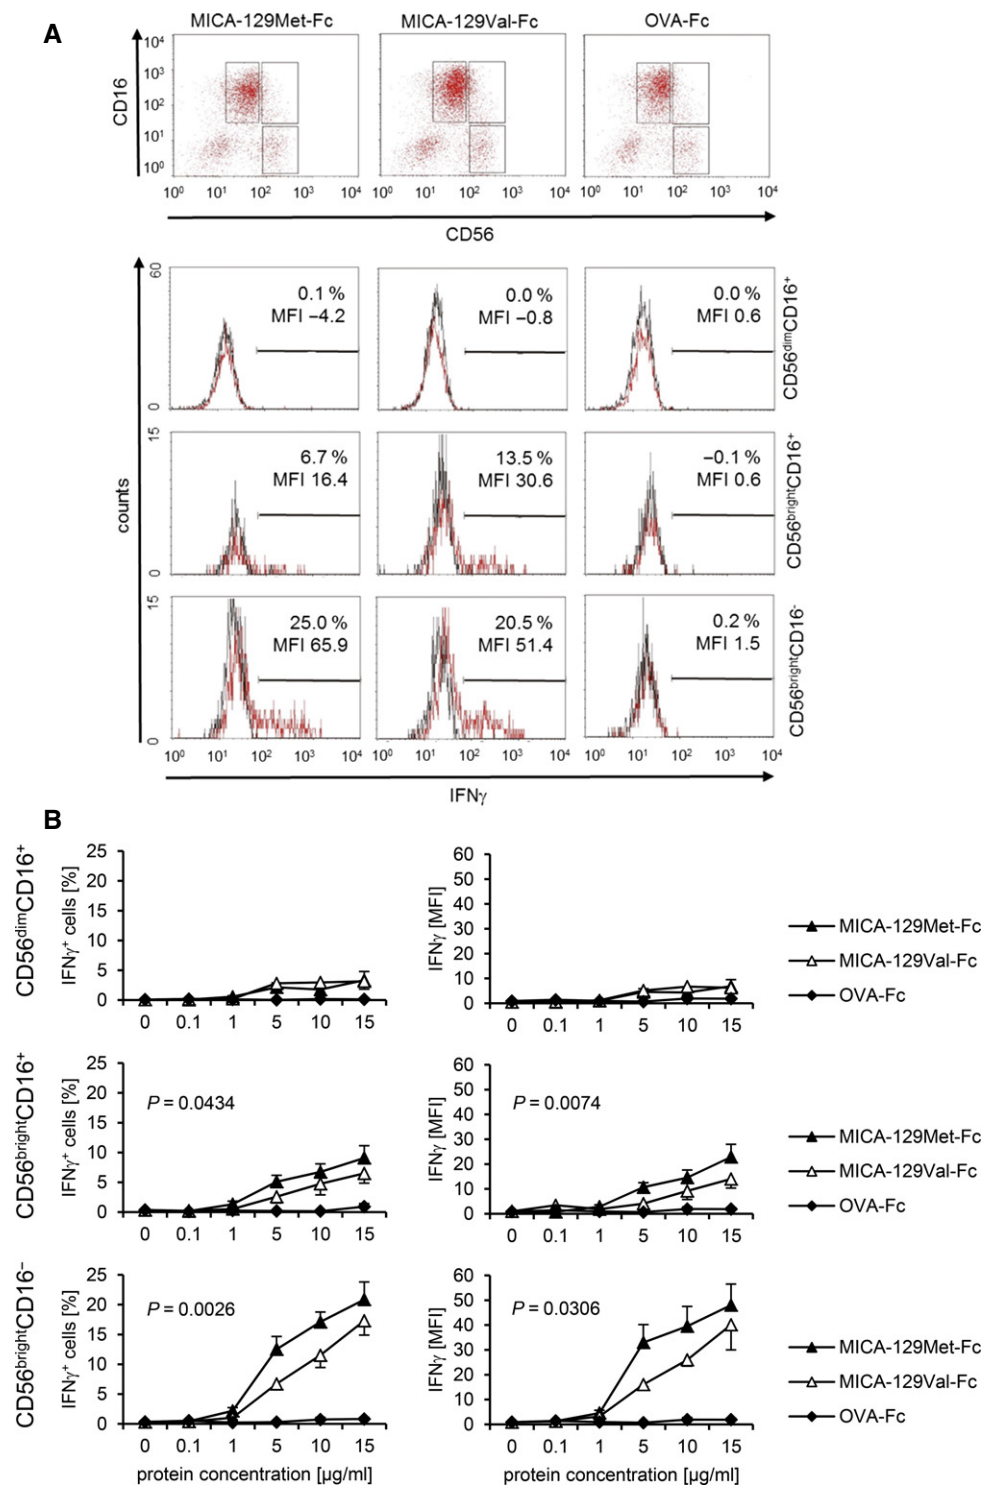

**Figure EV3. Expression of IFN $\gamma$  in CD56<sup>bright</sup>CD16<sup>-</sup> and CD56<sup>bright</sup>CD16<sup>+</sup> NK cells in response to the MICA-129Met and the MICA-129Val isoforms.**

**A** Purified IL-2-stimulated NK cells (100 U/ml for 4 days) were cultured for 4 h on plates coated with MICA-129Met-Fc, MICA-129Val-Fc, or OVA-Fc proteins (0, 0.1, 1, 5, 10, 15  $\mu$ g/ml) before flow cytometry. The NK-cell populations were gated as exemplified in the upper panel (CD56<sup>dim</sup>CD16<sup>+</sup>, CD56<sup>bright</sup>CD16<sup>+</sup>, CD56<sup>bright</sup>CD16<sup>-</sup>). The intracellular IFN $\gamma$  expression in these populations is displayed in the lower panel (red: IFN $\gamma$ , black: isotype control). The specific MFI (MFI IFN $\gamma$  minus MFI isotype control) and the percentage of IFN $\gamma$ + cells are indicated.

**B** A summary (means  $\pm$  SEM) of 9 experiments is shown. The data were analyzed by two-way ANCOVA adjusted for the protein concentration (5, 10, 15  $\mu$ g/ml), and the *P*-values of significant differences between the MICA-129Met-Fc and MICA-129Val-Fc proteins are indicated.

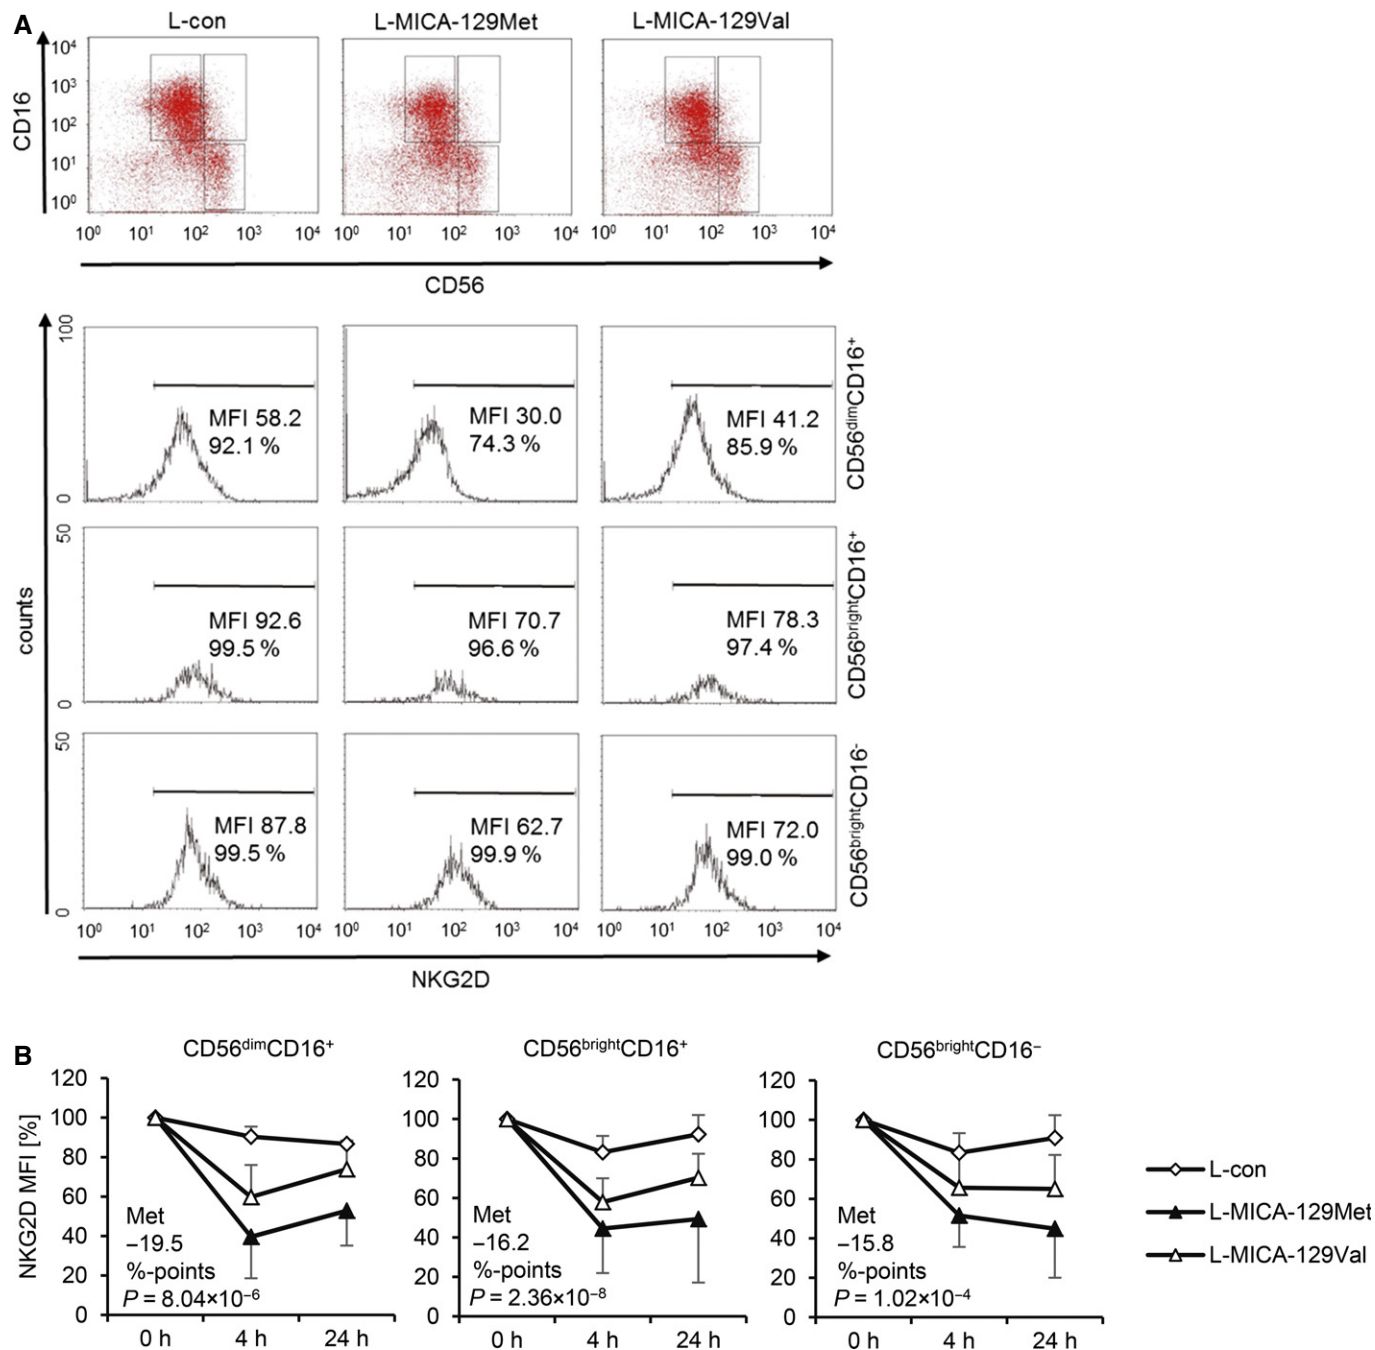

**Figure EV4.** Down-regulation of NGK2D on CD56<sup>dim</sup>CD16<sup>+</sup>, CD56<sup>bright</sup>CD16<sup>+</sup>, and CD56<sup>bright</sup>CD16<sup>-</sup> NK cells in response to the MICA-129Met and the MICA-129Val isoforms.

A Purified IL-2-stimulated NK cells (100 U/ml for 4 days) were co-cultured with L-con, L-MICA-129Met, or L-MICA-129Val clones for 4 h. Three NK-cell populations (CD56<sup>dim</sup>CD16<sup>+</sup>, CD56<sup>bright</sup>CD16<sup>+</sup>, CD56<sup>bright</sup>CD16<sup>-</sup>) were gated as illustrated in the upper panel. The NGK2D expression on these NK-cell populations is displayed in the lower panel, and the MFI of NGK2D and the percentages of NGK2D<sup>+</sup> cells are indicated.

B A summary (means + SD) of NGK2D expression on the three NK-cell populations 4 and 24 h after co-culture with L-con ( $n = 3$ ), L-MICA-129Met ( $n = 17$ ), and L-MICA-129Val clones ( $n = 18$ ) is displayed. The NGK2D expression (MFI) at the beginning (0 h) was set to 100%. The average reduction of NGK2D on NK cells in response to L-MICA-129Met compared to L-MICA-129Val clones at 4 and 24 h (%-points) is indicated in the panels. The differences were analyzed by repeated measures ANOVA, and  $P$ -values are indicated.

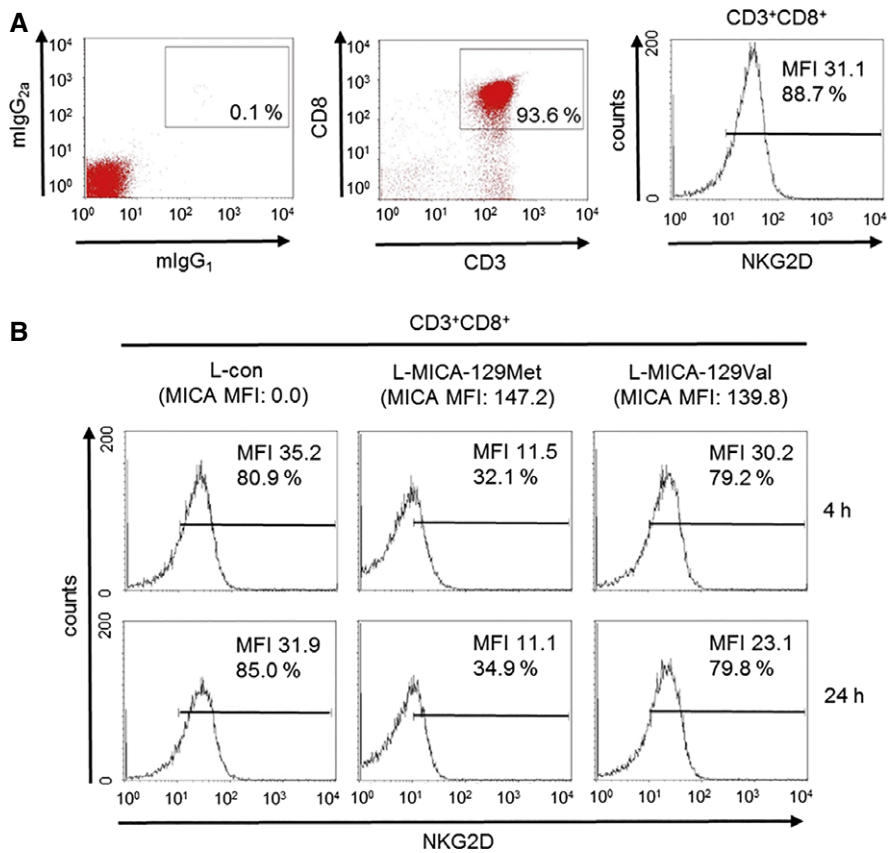

**Figure EV5. Down-regulation of NKG2D on CD8<sup>+</sup> T cells in response to the MICA-129Met and MICA-129Val isoforms.**

**A** Purified CD8<sup>+</sup> T cells were analyzed by flow cytometry for NKG2D expression as illustrated here. The MFI for NKG2D and the percentage of NKG2D<sup>+</sup>CD8<sup>+</sup> T cells are indicated.

**B** The NK cells were subsequently co-cultured with an L-con, L-MICA-129Met, or L-MICA-129Val clone (the MFI values for MICA on these clones are indicated above the histograms in brackets). NKG2D expression was determined as illustrated in (A) after 4 and 24 h. The MFI for NKG2D and the percentages of NKG2D<sup>+</sup>CD8<sup>+</sup> T cells are indicated.
